1 **Efficacy of Intrawound Vancomycin in Prevention of Periprosthetic Joint Infection**  
2 **After Primary Total Knee Arthroplasty**  
3 *A Prospective Double-Blinded Randomized Control Trial*

4  
5 Authors:  
6

- 7 1. Praharsha Mulpur<sup>1</sup>  
8 Consultant Orthopaedic and Joint Replacement Surgeon  
9 [Praharshamulpur9@gmail.com](mailto:Praharshamulpur9@gmail.com)  
10  
11 2. Tarun Jayakumar<sup>1</sup> [Corresponding Author]  
12 Registrar, Arthroplasty  
13 [tarunjaykumar@gmail.com](mailto:tarunjaykumar@gmail.com)  
14  
15 3. Ramakanth R Yakkanti<sup>2</sup>  
16 MD, Rothman Orthopaedic Institute  
17 [yakkanti1@gmail.com](mailto:yakkanti1@gmail.com)  
18  
19 4. Aditya Apte<sup>1</sup>  
20 Research Fellow, Division of Arthroplasty  
21 [dradityaapte@gmail.com](mailto:dradityaapte@gmail.com)  
22  
23 5. Kushal Hippalgaonkar<sup>1</sup>  
24 Consultant Orthopaedic and Joint Replacement Surgeon  
25 [kushalhippal@gmail.com](mailto:kushalhippal@gmail.com)  
26  
27 6. Adarsh Annapareddy<sup>1</sup>  
28 Consultant Orthopaedic and Joint Replacement Surgeon  
29 [dr.adarshannapareddy@gmail.com](mailto:dr.adarshannapareddy@gmail.com)  
30  
31 7. A B Suhas Masilamani<sup>1</sup>  
32 Consultant Orthopaedic and Joint Replacement Surgeon  
33 [drsuhhas09@gmail.com](mailto:drsuhhas09@gmail.com)  
34  
35 8. A V Gurava Reddy<sup>1</sup>  
36 Consultant and Chief Orthopaedic and Joint Replacement Surgeon  
37 [guravareddy@gmail.com](mailto:guravareddy@gmail.com)  
38

39 **Affiliations:**

- 40 1- Sunshine Bone and Joint Insitute, KIMS-Sunshine Hospitals, Hyderabad, India  
41 2- Rothman Orthopedic Institute, Philadelphia  
42

43  
NOTE: This preprint reports new research that has not been certified by peer review and should not be used to guide clinical practice.

44 **ABSTRACT**

45

46 **Introduction:** Peri-prosthetic Joint Infection (PJI) after total knee arthroplasty (TKA) is a  
47 devastating complication. Intra-wound vancomycin powder has been shown to reduce  
48 infection rates in spine surgery. Previous studies on the efficacy of local vancomycin powder  
49 in hip or knee arthroplasty are mostly retrospective case series. The aim of this prospective  
50 RCT was to evaluate the efficacy and safety of intrawound vancomycin in preventing PJI  
51 after primary TKA.

52 **Methods:** This study was a National Trial Registry-approved RCT of patients undergoing  
53 primary TKA. 1022 patients were randomized to the study group (n=507, received 2g  
54 intrawound vancomycin powder before arthrotomy closure) and control groups (n=515, no  
55 local vancomycin). The minimum follow-up was 12-months. The primary outcome was PJI  
56 rate. Secondary outcomes included surgical site infection (SSI) rates, incidence of revision  
57 for PJI/SSI, and incidence of wound complications. High-risk groups (Obesity and Diabetes)  
58 in both cohorts were also evaluated.

59 **Results:** The overall infection rate in 1022 patients was 0.66%. There was no significant  
60 difference in PJI rate in the study group (0.2%) versus the control group (0.58%), p=0.264.  
61 Reoperation rates in the study group (N=4;0.78%) and Control (N=5;0.97%) and SSI rates in  
62 the study (N=1;0.2%) and control groups (N=2;0.38%) were comparable. The Vancomycin  
63 cohort however demonstrated a significantly higher number of minor wound complications  
64 (n=67;13.9%) compared to the control group (n=39;8.4%, p<0.05). There was no difference  
65 in PJI/SSI rates or minor surgical complications among high-risk groups and no cases of  
66 nephrotoxicity were reported in the study.

67 **Conclusion:** Intra-wound vancomycin powder does not appear to reduce PJI/SSI rate in  
68 primary total knee arthroplasties, including high-risk groups. Although safe from a renal  
69 perspective, intra-wound vancomycin was associated with an increase in postoperative  
70 aseptic wound complications such as persistent wound drainage. Intra-wound vancomycin  
71 may not be effective in reducing the rate of PJI in primary TKA.

72

73 **Keywords:** Infection; Arthroplasty; Knee; Prosthetic Joint Infection; Surgical site infection

74

75

76

77

## 78 INTRODUCTION

79 There is an ever-increasing global burden of primary total knee and total hip arthroplasty  
80 procedures, with a significant increase in surgery numbers projected by the year 2030 (1–3).  
81 With increasing numbers of primary total joint replacement surgeries, healthcare systems  
82 across the world are poised to handle an increased burden of revision arthroplasty cases.  
83 Worldwide, the reported incidence of PJI after total joint replacement is around 0.8-1.5%,  
84 with a 1-2% PJI risk after TKA (4–6).

85

86 Periprosthetic joint infection (PJI) is one of the most common indications for revision after  
87 TKA (7–9) posing a significant burden to the healthcare system (10,11). There has been  
88 increasing interest in the use of local antibiotic powder in the joint before closure to prevent  
89 local contamination and biofilm formation. The use of intrawound vancomycin in preventing  
90 surgical site infections is well documented in spine surgery (12–14). There are some  
91 published reports of the benefits of local vancomycin powder used in surgeries of the elbow,  
92 foot and ankle surgery (15,16). However, its use and clinical benefit in total knee arthroplasty  
93 is debatable.

94

95 The main postulated advantages of using local vancomycin powder are its relatively cheap  
96 cost, favourable bacterial spectrum (MRSA, coagulase-negative staphylococci), high local  
97 concentrations without systemic adverse effects (17,18). Systematic reviews and meta-  
98 analyses on studies evaluating the use of vancomycin in primary total knee or hip arthroplasty  
99 reported low-quality evidence with a high risk of study bias (19,20). No randomized control  
100 trial (RCT) has evaluated the efficacy of local vancomycin powder in primary TKA.

101

102 The primary objective of this study was to evaluate the efficacy of intra-wound vancomycin  
103 in reducing SSI or PJI rates in patients undergoing primary total knee arthroplasty. Secondary  
104 objectives include the evaluation of wound-healing-related complications, incidence of  
105 nephrotoxicity, and the influence of diabetes and obesity on outcomes.

106

107

## 108 Methods

109 This is an Institutional Review Board (IRB) approved prospective randomized, controlled  
110 trial (RCT), and was prospectively registered with the National Central Trial Registry  
111 (CTRI/2021/02/031310). This is a single-centre RCT of patients from a high-volume tertiary

112 care institute, who underwent primary total knee arthroplasty (TKA) for primary  
113 osteoarthritis of the knee, between January 2021 and February 2022. The RCT was a parallel-  
114 arm trial with a 1:1 allocation of patients into study and control groups. Study group patients  
115 receive intra-articular 2g Vancomycin antibiotic powder before arthrotomy closure, control  
116 group patients did not receive local vancomycin powder. The trial was conducted following  
117 the guidelines of the Declaration of Helsinki on scientific studies involving human subjects.

118

119 All adult patients with primary osteoarthritis of the knee, consenting to primary manual jig-  
120 based TKA were eligible for recruitment in this trial. This includes patients with primary OA,  
121 with either varus or valgus deformity of the knee. Patients were excluded from the trial if  
122 they met any of the following exclusion criteria- refusal to participate in the trial, intra-  
123 operative findings suggestive of inflammatory arthropathy or non-specific synovitis, previous  
124 knee surgeries, history of intra-articular knee injections within 3 years before surgery, known  
125 allergy to Vancomycin, and if they were known cases of chronic immunosuppression  
126 (secondary to human immuno-deficiency virus-HIV, malignancy or post-solid organ  
127 transplant). Patients who used antibiotics for any cause, within 1-month leading up to surgery  
128 were also excluded from the trial.

129

130 There were a total of 1208 eligible patients who underwent primary TKA during the study  
131 period (January 2021 to January 2022). 56 patients declined to participate in the trial and a  
132 further 24 patients were excluded due to exclusion criteria (12 patients used antibiotics for  
133 Urinary tract infections, 8 patients with recent intra-articular knee visco-supplementation  
134 injections and 4 patients with chronic immunosuppression). After exclusions, 1128 patients  
135 were randomized to the study and control groups. 34 patients were excluded from the final  
136 data analysis after randomization (16 deaths in the follow-up period, 18 cases with intra-  
137 operative findings suggestive of inflammatory arthropathy or non-specific synovitis).

138

139 The final study cohorts consisted of 549 patients in the study group and 545 patients in the  
140 Control group. There was a loss to follow-up of 42 patients (8%) in the study group and 30  
141 patients (5.76%) in the control group, Final analysis included 507 subjects in the study group  
142 and 515 subjects in the control group.

143

144 Eligible trial participants undergoing primary total knee arthroplasty were randomized (1:1  
145 allocation by computer randomization) to receive either normal saline lavage with (study

146 group) or without (control group) intra-articular 2g Vancomycin powder prior to arthrotomy  
147 closure. All patients were operated on at the same institute, in laminar flow operating rooms.  
148 Except for the use of vancomycin powder in the surgical wound, the operating procedures  
149 and peri-operative protocols were common to both groups. The patients are blinded and  
150 unaware of the assigned groups and follow-up evaluation for infection related complications  
151 was performed by a blinded observer.

152  
153 All cases in this trial received a standard antibiotic prophylaxis protocol, which includes 3  
154 peri-operative intra-venous doses of 1.5g of Cefuroxime. The first dose was administered 1  
155 hour before the skin incision and 2 doses were administered 8 hours and 24 hours after  
156 surgery. None of the cases in this trial received prolonged Oral antibiotic use after surgery.  
157 Skin preparation at the time of surgery was done with Chlorhexidine skin scrub (3M,  
158 Avagard 4% Chlorhexidine Scrub). TKA was performed through a medial para-patellar  
159 approach in all cases, under a tourniquet. Tourniquet was inflated from the time of the  
160 incision till the cement was fully-set after final implantation. The knee joint was irrigated  
161 with a total of 3 L of normal saline with pulse lavage before and after cementing of the  
162 implant. All cases received bone cement without antibiotic impregnation (Palacos/ Stryker  
163 Simplex low-viscosity cement). Patella was not resurfaced in any case, in either group. After  
164 deflation of the tourniquet and haemostasis of bleeding vessels, the study group received 2g  
165 vancomycin powder, which was placed into the medial and lateral joint gutters and  
166 arthrotomy closed with No.2 Vicryl in an interrupted fashion followed by a continuous  
167 STRATAFIX (Barbed-PDS) running stitch. Suction drains were not used in any case.

168  
169 Post-operative blood investigations (Renal parameters, CBP) were obtained 24 hours after the  
170 surgery. In all cases, wound dressing was changed 24 hours later in the PACU, with  
171 MEPILEX surgical dressing (*Mepilex Border Post-op, Mölnlycke, Göteborg, Sweden*).  
172 Patients in both groups received uniform rehabilitation with assisted walking and range of  
173 motion exercises on the first postoperative day. Deep vein thrombosis prophylaxis was  
174 common with low-Molecular weight heparin (LMWH) in the immediate postoperative period  
175 and Oral Apixaban 2.5mg twice daily for 14 days following surgery. Surgical staple removal  
176 is done between Day 14 and Day 21 after surgery. Staple removal after 21 days is considered  
177 to be “Delayed staple/clip removal”. Patients were routinely followed up at 2 weeks, 4 weeks,  
178 3 months and 6 months and 12 months after surgery.

179

180 Based on the criteria identified by Parvizi et al (21), early peri-prosthetic joint infection was  
181 defined as an infection diagnosed within 90 days of surgery. Infection was diagnosed based  
182 on the MSIS criteria and the 2018 Definition of Periprosthetic Hip and Knee Infection  
183 consisting of 2 positive cultures (from an aspirate and/or at the time of debridement for PJI or  
184 SSI), elevated serum ESR, CRP and elevated white cell counts in synovial fluid aspirates  
185 ( $>10,000$  cells/mm<sup>3</sup>), PMN percentage greater than 90% in the synovial aspirate(21,22).  
186 Cases of possible infections based on the 2018 ICM (International Consensus Meeting)  
187 scoring system were confirmed based on the findings of pus in aspirate and intra-operative  
188 findings of purulence.

189 Surgical site infections and deep peri-prosthetic joint infections were considered major  
190 surgical complications, necessitating re-operation. Minor complications included delayed  
191 wound healing with or without dehiscence, delayed surgical staple removal, and stitch/suture  
192 abscess (based on CDC Guidelines) necessitating oral antibiotic use. Persistent wound  
193 drainage was defined as, wound drainage beyond 72-hours necessitating surgical dressing  
194 change, based on previous definitions of persistent wound drainage (21,23).

195 Patients were also monitored in the peri-operative period for medical complications of  
196 Myocardial infarction, DVT/PE, CVA and nephrotoxicity secondary to the use of  
197 vancomycin.

198

### 199 **Statistical analysis**

200 Xu et al conducted a systematic review and meta-analysis of intra-wound vancomycin  
201 powder used in primary total knee and hip arthroplasty(24). This meta-analysis concluded  
202 that a minimum sample of 1000 patients was required for analysis, to conform to a decrease  
203 of PJI rate from 2.74% to 1% in control versus study groups, with a power of 80% and 5%  
204 significance level. Assuming a drop-out rate of 10%, we recruited over 1100 eligible subjects  
205 for trial participation and randomization. Statistical analysis was performed using a 2-tailed  
206 or independent samples t-test for continuous data parameters. The Chi-squared test or  
207 Fisher's Exact test was used for categorical data parameters. Statistical analysis was  
208 performed using SPSS Version 24 (International Business Machines- IBM, Armonk, NY).  
209 Assuming a power of 80% and 95% confidence intervals, a p-value less than 0.05 was  
210 considered significant.

211

212

## 213 **Results**

214 A total of 1022 patients were included in the final statistical analysis, with 507 patients in the  
215 study group and 515 patients in the control group, after exclusions, loss to follow-up and  
216 deaths. Demographic variables and baseline characteristics such as comorbidities, BMI, ASA  
217 grading, and CCI grading were comparable between both groups and summarised in **Table.1**.  
218 The mean tourniquet times and mean haemoglobin drop after surgery were also comparable  
219 between both groups. The CONSORT Flowchart of participant recruitment is shown in  
220 *Figure.1*

221

### 222 *Infection rates*

223 The overall infection rate in the study population was 0.66%. Periprosthetic joint infection  
224 (PJI) was seen in 1 patient (0.19%) in the study group and 3 patients (0.58%) in the control  
225 group, and the difference was not statistically significant. Surgical site infection (SSI) was  
226 reported in 1 (0.19%) patient in the study group and 2 patients (0.38%) in the control group. 2  
227 patients in the study group had periprosthetic fractures of the distal femur during the follow-  
228 up period and underwent ORIF. All complications in the trial are summarized in **Table 2**.

229

### 230 *Peri-prosthetic Joint Infections (PJI)*

231 In the study group, one patient (0.19%) underwent DAIR for a culture-negative PJI, 4 weeks  
232 after surgery. This patient had elevated serum ESR, CRP and White cell counts and frank pus  
233 aspirated from the joint before DAIR. In the control group, 3 patients (0.58%) underwent  
234 DAIR, of which one patient had Staphylococcus aureus isolated, and later went on to have a  
235 2-stage revision due to the persistence of infection. The other two patients had culture-  
236 negative PJI and underwent DAIR.

237

### 238 *Surgical Site Infections (SSI)*

239 One patient in the study group presented with an early SSI, with Staphylococcus epidermidis  
240 the pathogenic organism isolated. This patient presented with persistent wound discharge  
241 which was managed with superficial wound debridement and secondary closure and iv  
242 antibiotics. 2 patients in the control group developed SSI, for which one patient underwent  
243 debridement and secondary closure for local wound necrosis and the other patient developed  
244 septic shock and Multi-Organ Dysfunction (MODS) following wound debridement at an  
245 outside hospital, requiring hospitalization and intravenous antibiotics. The major  
246 complications of PJI and SSI are summarized in **Table 3**.

247

### 248 ***Re-operation Rates***

249 Re-operation rates between both groups were found to be statistically comparable, with 4  
250 0.78%) patients in the study group (1-PJI, 1-SSI, 2-Periprosthetic fracture) versus 5 cases  
251 (0.97%) in the control group (3-PJI, 2-SSI). **(Table 2)**

252

### 253 ***Wound Complications***

254 The use of vancomycin was associated with a significantly higher number of minor wound  
255 complications in the study group (n=67; 13.9%) compared to the control group (n=39; 8.4%,  
256 p<0.05). Aseptic wound complications such as wound soakage, maceration and stitch abscess  
257 were managed with regular dressings without any additional oral or intravenous antibiotic  
258 use. Delayed suture removal (>3 weeks) was found to be similar in both groups and not  
259 statistically significant. **(Table 2)**

260

### 261 ***Sub-group Analysis***

262 We evaluated differences in complication rates amongst patients of both groups based on  
263 BMI and compared diabetics with non-diabetics. There was no difference in PJI/SSI rates or  
264 minor surgical complications among high-risk groups, Diabetics versus non-diabetics, **(Table**  
265 **4)** and high BMI vs normal BMI **(Tables 5 & 6)**.

266

### 267 ***Systemic Complications and Mortality***

268 The use of intra-wound vancomycin was not associated with acute kidney injury (defined as  
269 an increase in serum creatinine levels by more than 0.3mg/dl within 48 hours)(25).

270 A total of 16 patients expired in the follow up period (10 patients in the study group versus 6  
271 patients in the control group. One patient in the control group developed DVT with  
272 Pulmonary embolism 45 days post-surgery and expired. Other patients expired secondary to  
273 non-surgical factors (1 patient secondary to complications of CKD in the control group, 1  
274 patient with Pleural effusion, 4 patients expired after treatment for trauma unrelated to the  
275 prior knee arthroplasty). No cases of CVA, AMI, Nephrotoxicity, Ototoxicity or anaphylactic  
276 reactions were observed or documented in the post-operative 90-day follow-up period.

277

278

279

280



281 **Discussion**

282 This randomised control trial did not demonstrate any additional clinical benefit of topical or  
283 intra-wound vancomycin powder in preventing SSI/PJI in patients undergoing primary total  
284 knee arthroplasty. On the contrary, there was a significant increase in wound healing  
285 complications in the study group, with a significantly higher incidence of persistent wound  
286 discharge and stitch abscess compared to the control group.

287

288 PJI after TKA bears a heavy toll on the patient and contributes to the economic burden on the  
289 healthcare systems (6,11). The use of local antibiotic powder in orthopaedic surgery is not  
290 new, with several reports of benefits in spine surgery (12–14,19,26). However, most of these  
291 studies were retrospective and non-randomised. Tubaki et al published the only RCT on the  
292 use of vancomycin in spine surgery and concluded that there was no difference in infection  
293 rates with the use of vancomycin (27).

294

295 The role of topical or intra-wound vancomycin in primary total knee arthroplasty is  
296 undecided, with studies both supporting and refuting the efficacy of vancomycin in reducing  
297 post-operative PJI rates.

298

299 Heckman et al (28) published a meta-analysis and systematic review of intra-wound  
300 vancomycin in total hip and knee arthroplasty with evidence demonstrating lower infection  
301 rates with the use of vancomycin. However, all 6 studies included in the meta-analysis were  
302 retrospective case series with Level-III evidence. Xu H et al published their meta-analysis of  
303 4607 patients reporting a reduced PJI rate with the use of vancomycin but a higher incidence  
304 of local wound complications and superficial surgical site infections (24). Our trial had  
305 similar findings of a higher incidence of minor complications such as persistent wound  
306 drainage and stitch abscesses in the study group.

307

308 Although previous studies attempted to evaluate the efficacy of intra-wound vancomycin,  
309 most were either underpowered due to the relatively low incidence of PJI, or suffered from  
310 low quality evidence secondary to retrospective study designs or lack of randomization. To  
311 the best of our knowledge, this study is the first prospective randomized control trial on the  
312 use of intra-wound vancomycin in primary TKA.

313

314

315 *Effect of intra-wound vancomycin on PJI/SSI*

316 In this trial, the use of intra-wound vancomycin powder in primary TKA failed to show a  
317 reduction in the incidence of PJI/SSI. Previously published studies also showed no decrease  
318 in the incidence of PJI with local vancomycin use (29,30)(31). On the contrary, Winkler et al  
319 showed a statistically significant decrease in PJI in primary TKA. In the same study,  
320 however, there was only a trend towards decreased PJI with local antibiotic administration in  
321 THA and revision TKA/THA without statistical significance (32). The main limitation of this  
322 report was the retrospective study design and heterogeneity of the study population which  
323 included both primary and revision knee or hip arthroplasty, with varying intra-operative  
324 protocols.

325  
326 Most studies reporting reduced infection rates with the use of intra-wound vancomycin were  
327 retrospective (33,34). Otte et al in their study of 1640 patients showed that 1g of intra-wound  
328 vancomycin significantly reduced the incidence of PJI in both primary and revision scenarios  
329 for both hips and knees (35). Patel et al also reported that intra-wound vancomycin was both  
330 safe and effective in reducing rates of early PJI in both primary hip and knee arthroplasties  
331 (36).

332  
333 A meta-analysis by Peng et al, which included 4512 patients in 9 studies, also recommended  
334 the use of vancomycin powder to reduce the incidence of PJI without modifying the bacterial  
335 spectrum (37). A recent systematic review of 3371 patients did not demonstrate a significant  
336 reduction in PJI in patients receiving vancomycin (38). This was similar to the findings of the  
337 current trial.

338  
339 This trial also showed a statistically significant increase in minor wound complications such  
340 as persistent wound drainage and stitch abscesses with the use of vancomycin. However, this  
341 should be interpreted with caution, as the trial may be underpowered to evaluate minor  
342 complications. Similar wound complications were also reported in previously published  
343 studies (20,24,26,33). The exact cause of this has not been determined but has been attributed  
344 to the crystalline nature of the vancomycin salt, low pH of the vancomycin solution or as a  
345 part of the body's inflammatory response to the vancomycin which leads to seroma formation  
346 and subsequent wound complications (39). The aseptic wound complications in our study  
347 were managed using repeated sterile wound dressings without the routine use of antibiotics.

348 Management of persistent wound drainage and breakdown can vary with some institutes  
349 opting for wound debridement and secondary closure in the operation theatre (20,33).

350

351 *Use of intra-wound vancomycin in diabetics and other high-risk groups*

352 The use of vancomycin did not appear to significantly influence SSI/PJI rates in diabetics  
353 versus non-diabetics in the study population. There was no difference in outcomes based on  
354 the BMI classification of patients.

355

356 The strengths of this study include the prospective randomised study design, the trial  
357 performed at a single high-volume arthroplasty institute with a standardised protocol  
358 followed in all cases and a very low attrition during the follow-up period.

359

360 This study has some limitations. Firstly, this study is powered to detect a 1.7% difference in  
361 the PJI rates between the study and control groups. The trial is not adequately powered to  
362 detect smaller differences in PJI rates. The study may be underpowered for the minor  
363 complications such as prolonged wound drainage and delayed wound healing. This calls for  
364 large-volume multi-centre RCTs, with uniform protocols in peri-operative management.  
365 Registry-based studies will be high-powered but subject to bias due to varying institutional  
366 protocols in the asepsis procedures and antibiotic policies. Secondly, the results in this trial  
367 are based on data from a single institute. Although the surgical technique, aseptic precautions  
368 and antibiotic policy have been standardised across the study population, the findings may  
369 not be generalizable to other institutions dissimilar to ours. Other limitations include sub-  
370 analysis of other factors potentially contributing to PJI rate such as smoking or individual  
371 comorbidities, which were not independently evaluated.

372

## 373 **CONCLUSION**

374 Intra-wound vancomycin powder application does not appear to reduce PJI/SSI rate in  
375 primary total knee arthroplasties, including in high-risk groups. The use of intra-wound  
376 vancomycin was associated with an increase in postoperative aseptic wound complications  
377 such as persistent wound drainage. Intra-wound vancomycin may not be effective in reducing  
378 the rate of PJI in primary TKA.

379

380

381

## 382 REFERENCES

- 383 1. Ackerman IN, Bohensky MA, Zomer E, Tacey M, Gorelik A, Brand CA, et al. The  
384 projected burden of primary total knee and hip replacement for osteoarthritis in  
385 Australia to the year 2030. *BMC Musculoskelet Disord*. 2019 Feb;20(1):90.
- 386 2. Kim TW, Kang S-B, Chang CB, Moon S-Y, Lee Y-K, Koo K-H. Current Trends and  
387 Projected Burden of Primary and Revision Total Knee Arthroplasty in Korea Between  
388 2010 and 2030. *J Arthroplasty*. 2021;36(1):93–101.
- 389 3. Kurtz S, Ong K, Lau E, Mowat F, Halpern M. Projections of primary and revision hip  
390 and knee arthroplasty in the United States from 2005 to 2030. *J Bone Joint Surg Am*.  
391 2007 Apr;89(4):780–5.
- 392 4. Springer BD, Cahue S, Etkin CD, Lewallen DG, McGrory BJ. Infection burden in total  
393 hip and knee arthroplasties: an international registry-based perspective. *Arthroplast*  
394 *today*. 2017 Jun;3(2):137–40.
- 395 5. Kapadia BH, Berg RA, Daley JA, Fritz J, Bhave A, Mont MA. Periprosthetic joint  
396 infection. *Lancet (London, England)*. 2016 Jan;387(10016):386–94.
- 397 6. Kurtz SM, Lau E, Schmier J, Ong KL, Zhao K, Parvizi J. Infection burden for hip and  
398 knee arthroplasty in the United States. *J Arthroplasty*. 2008 Oct;23(7):984–91.
- 399 7. Clohisy JC, Calvert G, Tull F, McDonald D, Maloney WJ. Reasons for revision hip  
400 surgery: a retrospective review. *Clin Orthop Relat Res*. 2004 Dec;(429):188–92.
- 401 8. Fehring TK, Odum S, Griffin WL, Mason JB, Nadaud M. Early failures in total knee  
402 arthroplasty. *Clin Orthop Relat Res*. 2001 Nov;(392):315–8.
- 403 9. Vessely MB, Whaley AL, Harmsen WS, Schleck CD, Berry DJ. The Chitranjan  
404 Ranawat Award: Long-term survivorship and failure modes of 1000 cemented  
405 condylar total knee arthroplasties. *Clin Orthop Relat Res*. 2006 Nov;452:28–34.
- 406 10. Premkumar A, Kolin DA, Farley KX, Wilson JM, McLawhorn AS, Cross MB, et al.  
407 Projected Economic Burden of Periprosthetic Joint Infection of the Hip and Knee in  
408 the United States. *J Arthroplasty*. 2021 May;36(5):1484-1489.e3.
- 409 11. Kurtz SM, Lau E, Watson H, Schmier JK, Parvizi J. Economic burden of  
410 periprosthetic joint infection in the United States. *J Arthroplasty*. 2012 Sep;27(8  
411 Suppl):61-5.e1.
- 412 12. Dodson V, Majmundar N, Swantic V, Assina R. The effect of prophylactic  
413 vancomycin powder on infections following spinal surgeries: a systematic review.  
414 *Neurosurg Focus*. 2019 Jan;46(1):E11.
- 415 13. Caroom C, Tullar JM, Benton EGJ, Jones JR, Chaput CD. Intrawound vancomycin

- 416 powder reduces surgical site infections in posterior cervical fusion. *Spine (Phila Pa*  
417 *1976)*. 2013 Jun;38(14):1183–7.
- 418 14. Bakhsheshian J, Dahdaleh NS, Lam SK, Savage JW, Smith ZA. The use of  
419 vancomycin powder in modern spine surgery: systematic review and meta-analysis of  
420 the clinical evidence. *World Neurosurg*. 2015 May;83(5):816–23.
- 421 15. Yan H, He J, Chen S, Yu S, Fan C. Intra-wound application of vancomycin reduces  
422 wound infection after open release of post-traumatic stiff elbows: a retrospective  
423 comparative study. *J shoulder Elb Surg*. 2014 May;23(5):686–92.
- 424 16. Wukich DK, Dikis JW, Monaco SJ, Strannigan K, Suder NC, Rosario BL. Topically  
425 Applied Vancomycin Powder Reduces the Rate of Surgical Site Infection in Diabetic  
426 Patients Undergoing Foot and Ankle Surgery. *Foot ankle Int*. 2015 Sep;36(9):1017–24.
- 427 17. Johnson JD, Nessler JM, Horazdovsky RD, Vang S, Thomas AJ, Marston SB. Serum  
428 and Wound Vancomycin Levels After Intra-wound Administration in Primary Total  
429 Joint Arthroplasty. *J Arthroplasty*. 2017 Mar;32(3):924–8.
- 430 18. Burdon DW. Principles of antimicrobial prophylaxis. *World J Surg*. 1982  
431 May;6(3):262–7.
- 432 19. Fleischman AN, Austin MS. Local Intra-wound Administration of Powdered  
433 Antibiotics in Orthopaedic Surgery. *J bone Jt Infect*. 2017;2(1):23–8.
- 434 20. Hanada M, Nishikino S, Hotta K, Furuhashi H, Hoshino H, Matsuyama Y. Intra-wound  
435 vancomycin powder increases post-operative wound complications and does not  
436 decrease periprosthetic joint infection in primary total and unicompartmental knee  
437 arthroplasties. *Knee Surg Sports Traumatol Arthrosc*. 2019 Jul;27(7):2322–7.
- 438 21. Parvizi J, Gehrke T, Chen AF. Proceedings of the International Consensus on  
439 Periprosthetic Joint Infection. *Bone Joint J*. 2013 Nov;95-B(11):1450–2.
- 440 22. Parvizi J, Tan TL, Goswami K, Higuera C, Della Valle C, Chen AF, et al. The 2018  
441 Definition of Periprosthetic Hip and Knee Infection: An Evidence-Based and  
442 Validated Criteria. *J Arthroplasty*. 2018 May;33(5):1309-1314.e2.
- 443 23. Ghanem E, Heppert V, Spangehl M, Abraham J, Azzam K, Barnes L, et al. Wound  
444 management. *J Orthop Res Off Publ Orthop Res Soc*. 2014 Jan;32 Suppl 1:S108-19.
- 445 24. Xu H, Yang J, Xie J, Huang Z, Huang Q, Cao G, et al. Efficacy and safety of  
446 intra-wound vancomycin in primary hip and knee arthroplasty. *Bone Joint Res*. 2020  
447 Nov;9(11):778–88.
- 448 25. Makris K, Spanou L. Acute Kidney Injury: Definition, Pathophysiology and Clinical  
449 Phenotypes. *Clin Biochem Rev*. 2016 May;37(2):85–98.

- 450 26. Kang DG, Holekamp TF, Wagner SC, Lehman RAJ. Intrasite vancomycin powder for  
451 the prevention of surgical site infection in spine surgery: a systematic literature  
452 review. *Spine J.* 2015 Apr;15(4):762–70.
- 453 27. Tubaki VR, Rajasekaran S, Shetty AP. Effects of using intravenous antibiotic only  
454 versus local intrawound vancomycin antibiotic powder application in addition to  
455 intravenous antibiotics on postoperative infection in spine surgery in 907 patients.  
456 *Spine (Phila Pa 1976).* 2013 Dec;38(25):2149–55.
- 457 28. Heckmann ND, Mayfield CK, Culvern CN, Oakes DA, Lieberman JR, Della Valle CJ.  
458 Systematic Review and Meta-Analysis of Intrawound Vancomycin in Total Hip and  
459 Total Knee Arthroplasty: A Call for a Prospective Randomized Trial. *J Arthroplasty.*  
460 2019 Aug;34(8):1815–22.
- 461 29. Koutalos AA, Drakos A, Fyllos A, Doxariotis N, Varitimidis S, Malizos KN. Does  
462 Intra-Wound Vancomycin Powder Affect the Action of Intra-Articular Tranexamic  
463 Acid in Total Joint Replacement? *Microorganisms.* 2020 May;8(5).
- 464 30. Yavuz IA, Oken OF, Yildirim AO, Inci F, Ceyhan E, Gurhan U. No effect of  
465 vancomycin powder to prevent infection in primary total knee arthroplasty: a  
466 retrospective review of 976 cases. *Knee Surg Sports Traumatol Arthrosc.* 2020  
467 Sep;28(9):3055–60.
- 468 31. Khatri K, Bansal D, Singla R, Sri S. Prophylactic intrawound application of  
469 vancomycin in total knee arthroplasty. *J Arthrosc Jt Surg [Internet].* 2017;4(2):61–4.  
470 Available from:  
471 <https://www.sciencedirect.com/science/article/pii/S2214963517300330>
- 472 32. Winkler C, Dennison J, Wooldridge A, Larumbe E, Caroom C, Jenkins M, et al. Do  
473 local antibiotics reduce periprosthetic joint infections? A retrospective review of 744  
474 cases. *J Clin Orthop trauma.* 2018 Mar;9(Suppl 1):S34–9.
- 475 33. Dial BL, Lampley AJ, Green CL, Hallows R. Intrawound Vancomycin Powder in  
476 Primary Total Hip Arthroplasty Increases Rate of Sterile Wound Complications. *Hip*  
477 *pelvis.* 2018 Mar;30(1):37–44.
- 478 34. Xu X, Zhang X, Zhang Y, Chen C, Yu H, Xue E. Role of intra-wound powdered  
479 vancomycin in primary total knee arthroplasty. *Orthop Traumatol Surg Res.* 2020  
480 May;106(3):417–20.
- 481 35. Otte JE, Politi JR, Chambers B, Smith CA. Intrawound Vancomycin Powder Reduces  
482 Early Prosthetic Joint Infections in Revision Hip and Knee Arthroplasty. *Surg*  
483 *Technol Int.* 2017 Feb;30:284–9.

- 484 36. Patel NN, Guild GN 3rd, Kumar AR. Intrawound vancomycin in primary hip and knee  
485 arthroplasty: a safe and cost-effective means to decrease early periprosthetic joint  
486 infection. *Arthroplast today*. 2018 Dec;4(4):479–83.
- 487 37. Peng Z, Lin X, Kuang X, Teng Z, Lu S. The application of topical vancomycin powder  
488 for the prevention of surgical site infections in primary total hip and knee arthroplasty:  
489 A meta-analysis. *Orthop Traumatol Surg Res*. 2021 Jun;107(4):102741.
- 490 38. Wong MT, Sridharan SS, Davison EM, Ng R, Desy NM. Can Topical Vancomycin  
491 Prevent Periprosthetic Joint Infection in Hip and Knee Arthroplasty? A Systematic  
492 Review. *Clin Orthop Relat Res*. 2021 Aug;479(8):1655–64.
- 493 39. Hoelen DWM, Tjan DHT, van Vugt R, van der Meer YG, van Zanten ARH. Severe  
494 local vancomycin induced skin necrosis. Vol. 64, *British journal of clinical*  
495 *pharmacology*. England; 2007. p. 553–4.
- 496  
497  
498  
499  
500  
501  
502  
503  
504  
505  
506  
507  
508  
509  
510  
511  
512  
513  
514  
515  
516  
517

518 **List of Tables**

| <b>Characteristics</b>          | <b>Study Group<br/>N=507</b> | <b>Control Group<br/>N=515</b> | <b>p-value</b> |
|---------------------------------|------------------------------|--------------------------------|----------------|
| Mean Age (SD)                   | 61.7 (7.52)                  | 61.4 (7.39)                    | 0.520 *        |
| Mean BMI (SD)                   | 28.5 (4.49)                  | 28.4 (4.52)                    | 0.722 *        |
| Mean Pre-op Haemoglobin (SD)    | 12.2 (1.41)                  | 12.3 (1.33)                    | 0.243 *        |
| Mean Post-op Haemoglobin (SD)   | 10.3 (1.34)                  | 10.4 (1.24)                    | 0.215 *        |
| Mean drop in Haemoglobin (SD)   | -1.96 (1.143)                | -1.91 (1.111)                  | 0.478 *        |
| Mean ASA (SD)                   | 2.02 (0.143)                 | 2.01 (0.186)                   | 0.336 *        |
| Mean Tourniquet Time (min) (SD) | 70.2 (16.35)                 | 71.1 (21.91)                   | 0.457 *        |
| Smoking N (%)                   | 58 (11.44)                   | 60 (11.65)                     | 0.916 *        |
| <b>CCI Risk Classification</b>  |                              |                                |                |
| Mild risk                       | 324 (63.9)                   | 330 (64.07)                    | 0.278 †        |
| Moderate risk                   | 156 (30.76)                  | 164 (31.84)                    |                |
| High Risk                       | 27 (5.34)                    | 21 (4.09)                      |                |
| Mean CCI (SD)                   | 2.3 (1.15)                   | 2.2 (1.14)                     | 0.163 *        |
| Gender Female N (%)             | 360 (71)                     | 358 (69.51)                    | 0.586 †        |
| Male N (%)                      | 147 (29)                     | 157 (30.49)                    |                |
| Diabetics N (%)                 | 170 (33.53)                  | 161 (31.26)                    | 0.438 †        |
| Hypothyroidism N (%)            | 85 (16.76)                   | 92 (17.86)                     | 0.642 †        |
| CKD N (%)                       | 2 (0.39)                     | 4 (0.77)                       | 0.424 †        |
| ASA N (%) ASA I                 | 6 (1.2)                      | 10 (1.94)                      | 0.220 †        |
| N (%) ASA II                    | 491 (96.84)                  | 492 (95.53)                    |                |
| N (%) ASA III                   | 10 (1.96)                    | 13 (2.53)                      |                |

519 \* independent samples t-test, † Chi-square test

520 **Table.1.** Demographic and Baseline Characteristics of the study population



521

|                                        | <b>Study Group</b><br>N(%) | <b>Control Group</b><br>N(%) | <b>p-value</b> |
|----------------------------------------|----------------------------|------------------------------|----------------|
| <b>Major Complications</b>             |                            |                              |                |
| SSI N (%)                              | 1                          | 2                            | 0.264 †        |
| PJI (DAIR)                             | 1                          | 3                            |                |
| Periprosthetic fracture                | 2                          | 0                            |                |
| <b>Minor Complications</b>             |                            |                              |                |
| Persistent Wound Drainage              | 43 (8.48)                  | 26 (5.04)                    | <b>0.010</b> † |
| Stitch Abscess                         | 20 (3.94)                  | 13 (2.52)                    | 0.945 †        |
| Delayed stitch removal (>3 weeks)      | 36 (7.1)                   | 36 (6.99)                    |                |
| <b>Medical Complications</b>           |                            |                              |                |
| Septic shock and MODS                  | 0                          | 1                            | NS †           |
| DVT                                    | 0                          | 1                            |                |
| CVA                                    | 0                          | 0                            |                |
| Acute kidney injury/<br>Nephrotoxicity | 0                          | 0                            |                |
| Cardiac complications                  | 0                          | 0                            |                |

522

†Chi-square test

523 **Table 2:** *Summary of complications in the study population*

524

525

526

527

528

529

530

531

532

533

534

535

536

537

538

| Patient        | Age Range | CCI | Time to Second surgery (weeks) | Culture report | Diagnosis | Treatment                                                                              |
|----------------|-----------|-----|--------------------------------|----------------|-----------|----------------------------------------------------------------------------------------|
| <b>Study</b>   |           |     |                                |                |           |                                                                                        |
| 1              | 51-60     | 1   | 5                              | No growth      | PJI       | DAIR                                                                                   |
| 2              | 51-60     | 1   | 6                              | No growth      | SSI       | Debridement and secondary suturing                                                     |
| <b>Control</b> |           |     |                                |                |           |                                                                                        |
| 1              | 61-70     | 4   | 13                             | S. aureus      | PJI       | <ul style="list-style-type: none"> <li>• DAIR</li> <li>• Two-stage revision</li> </ul> |
| 2              | 61-70     | 2   | 20                             | No growth      | PJI       | DAIR                                                                                   |
| 3              | 61-70     | 2   | 6                              | No growth      | PJI       | DAIR                                                                                   |
| 4              | 61-70     | 2   | 12                             | S. epidermidis | SSI       | Debridement and secondary suturing                                                     |
| 5              | 61-70     | 3   | 16                             | No growth      | SSI       | Debridement and secondary suturing<br>Septic shock and MODS                            |

539  
540  
541  
542  
543  
544  
545  
546

**Table 3:** *Clinical summary of PJI and SSI cases*

547  
548  
549

|                                         | <b>Study Group</b><br><b>n (%)</b> | <b>Control Group</b><br><b>n (%)</b> | <b>p-value</b> |
|-----------------------------------------|------------------------------------|--------------------------------------|----------------|
| <b>Number of Diabetics</b>              | 170 (33.5)                         | 161 (31.26)                          | 0.444 †        |
| Mean HbA1C (SD)                         | 6.6 (2.04)                         | 6.8 (1.95)                           | 0.109 *        |
| <b>DM-CCI grading</b>                   |                                    |                                      |                |
| Mild                                    | 61 (35.9)                          | 61 (37.9)                            | 0.439 †        |
| Moderate                                | 88 (51.8)                          | 87 (54.0)                            |                |
| Severe                                  | 21 (12.4)                          | 13 (8.1)                             |                |
| Mean CCI (SD)                           | 3.0 (1.03)                         | 2.9 (1.14)                           | 0.141 *        |
| <b>Infection rates</b>                  |                                    |                                      |                |
| <b>Major Complications</b>              |                                    |                                      |                |
| SSI                                     | 0                                  | 0                                    | 0.160 †        |
| PJI (DAIR)                              | 0                                  | 2                                    |                |
| <b>Minor Complications</b>              |                                    |                                      |                |
| Maceration, n (%)                       | 9 (5.3)                            | 6 (3.5)                              | 0.329 †        |
| Stitch Abscess, n (%)                   | 15 (9.3)                           | 4 (2.5)                              |                |
| Delayed staple removal (>3 weeks) n (%) | 36 (7.5)                           | 36 (7.3)                             | 0.942 †        |

550 \* independent samples t-test, † Chi-square test

551 **Table 4:** *Sub-group analysis of outcomes in the high-risk diabetic patients in both groups*

552  
553  
554  
555  
556  
557

558

|                    | Study Group<br>Minor complications<br>n (%) | Control Group<br>Minor complications<br>n (%) | p-value |
|--------------------|---------------------------------------------|-----------------------------------------------|---------|
| <b>BMI grading</b> |                                             |                                               | 0.759 † |
| Normal             | 16 (26.2)                                   | 11 (29.7)                                     |         |
| Overweight         | 24 (39.3)                                   | 16 (43.3)                                     |         |
| Class I Obese      | 15 (24.6)                                   | 5 (13.5)                                      |         |
| Class II Obese     | 5 (8.2)                                     | 4 (10.8)                                      |         |
| Class III Obese    | 1 (1.6)                                     | 1 (2.7)                                       |         |
| <b>Total</b>       | 61 (100.0)                                  | 37 (100.0)                                    |         |

559 † Chi-square test

560 **Table 5:** *Sub-group analysis of minor complications based on the classification of obesity*

561

562

|                    | Study Group<br>Major complications<br>n (%) | Control Group<br>Major complications<br>n (%) | p-value |
|--------------------|---------------------------------------------|-----------------------------------------------|---------|
| <b>BMI grading</b> |                                             |                                               | 0.507 † |
| Normal             | 1 (25.0)                                    | 0 (0.0)                                       |         |
| Overweight         | 2 (50.0)                                    | 3 (60.0)                                      |         |
| Class I Obese      | 1 (25.0)                                    | 2 (40.0)                                      |         |
| Class II Obese     | 0 (0.0)                                     | 0                                             |         |
| Class III Obese    | 0 (0.0)                                     | 0                                             |         |

563 † Chi-square test

564 **Table 6:** *Sub-group analysis of major complications based on the classification of obesity*

# ENROLMENT

Assessed for Eligibility  
(n=1208)

Excluded (n= 80)

- Declined to participate (n=56)
- Recent antibiotic usage (n=12)
- Intra-articular injections (n=8)
- Chronic immunosuppression (n=4)

Randomised (n= 1128)

Vancomycin (n=564)

Non-Vancomycin (n=564)

Excluded:

- Expired (n=10)
- Inflammatory arthritis/ Non-specific synovitis (n=5)

Excluded:

- Expired (n=6)
- Inflammatory arthritis/ Non-specific synovitis (n=13)

Analysed (n=549):

- Lost to Follow-up (n=42)

Analysed (n=545):

- Lost to Follow-up (n=30)

Final Analysed (n=507):

Final Analysed (n=515):
